# Supplementary material for: Systematic Review and Meta-Analysis of Diagnostic Accuracy of miRNAs in Patients with Pancreatic Cancer
Source: Dis Markers. 2018 May 15;2018:6292396. doi: 10.1155/2018/6292396 (PMC5977035; doi:10.1155/2018/6292396)
Supplement: Supplementary Material — The database consists of the following data selected articles. [file 6292396.f1.xlsx]

## Sheet: Sheet1
author		Tp	Fp	Fn	Tn	Ethnicity	Patient spectrum	Source of control	Patient age	Control age	Specimen	miRNA	miR-21	reference miRNA	miRNA profiling	STARD	QUDAS	SEN	SPE	Patient number	Control number	Sample size	QUDAS>6	n
Lee(2007)		28	4	0	17	0	1	1	.	.	1	1	1	18rRNA	a set of 9 miRNA	14	8	100	80.95	28	21	49	1	0
Dillhoff(2008)		63	13	17	44	0	1	1	.	.	1	0	1	U6	miR-21	12	6	78.8	77.2	80	57	137	0	1
Wang(2009)		21	6	18	23	0	0	0	.	.	0	0	0	miR-16	miR-155	14	7	53	78	39	29	68	1	1
Wang(2009)		13	4	18	20	0	0	0	.	.	0	0	0	miR-16	miR-196a	14	7	43	84	31	24	55	1	1
Wang(2009)		18	9	26	25	0	0	0	.	.	0	0	0	miR-16	miR-210	14	7	42	73	44	34	78	1	1
Wang(2009)		23	4	26	32	0	0	0	.	.	0	0	1	miR-16	miR-21	14	7	46	89	49	36	85	1	1
Wang(2009)		18	2	10	17	0	0	0	.	.	0	1	1	miR-16	panel	14	7	64	89	28	19	47	1	0
Habbe(2009)		52	1	12	53	0	1	0	.	.	1	0	1	RNU6B	miR-21	14	8	81	98	64	54	118	1	1
Habbe(2009)		53	4	11	50	0	1	0	.	.	1	0	0	RNU6B	miR-155	14	8	83	93	64	54	118	1	1
Hanoun(2010)		18	2	21	18	0	0	1	64	56	1	0	0	U6 RNA	miR-148a沉默	13	8	46.2	90	39	20	59	1	1
Ren(2011)		20	13	9	9	1	1	1	63	47	2	0	0	miR-16	miR-181b	10	7	68.6	41.4	29	22	51	1	1
Ren(2011)		18	13	11	9	1	1	1	63	47	2	0	0	miR-16	miR-196a	10	7	62.9	38.9	29	22	51	1	1
Ren(2011)		18	11	11	11	1	1	1	63	47	2	0	0	miR-16	miR-210	10	7	62.9	51.7	29	22	51	1	1
Morimura(2011)		34	7	2	29	1	1	0	68	58	0	0	0	RNU6B	miR-18a	20	9	90	75	36	30	66	1	1
Liu(2011)		54	6	8	30	1	1	0	62	48	0	0	0	miR-39	miR-155	13	7	87.1	83.3	62	36	98	1	1
Liu(2011)		40	16	22	45	1	1	1	62	49	0	0	0	miR-39	miR-155	13	7	64.4	73.8	62	61	123	1	1
Liu(2011)		39	15	23	82	1	1	1	62	48	0	0	0	miR-39	miR-155	13	7	62.9	84.5	62	97	159	1	1
Ryu(2011)		19	7	5	9	0	1	0	57	58	3	0	0	RNU6B	miR-221	16	10	80	55	24	16	40	1	0
Ryu(2011)		19	4	5	12	0	1	0	57	58	3	0	0	RNU6B	miR-21	16	10	80	76	24	16	40	1	0
Ryu(2011)		19	8	5	8	0	1	0	57	58	3	0	0	RNU6B	miR-17-3p	16	10	80	50	24	16	40	1	0
Szafranska-Schwarzbach (2011)		148	5	9	24	0	0	1	65	65	1	1	0	NO	a set of 7 miRNA	14	8	84.3	82.8	157	29	186	1	1
Liu(2011)		32	23	13	52	1	0	1	62	.	0	0	1	miR-39	miR-21	13	6	71.1	69.3	45	75	120	0	1
Liu(2011)		35	10	10	20	1	0	0	62	.	0	0	0	miR-39	miR-21	13	6	77.8	66.7	45	30	75	0	1
Liu(2011)		30	13	15	32	1	0	1	62	.	0	0	0	miR-39	miR-21	13	6	66.7	71.7	45	45	90	0	1
Pan(2012)		22	2	2	22	1	1	0	59	60	0	0	0	miR-39	miR-451	11	6	91.7	91.7	24	24	48	0	0
Pan(2012)		23	2	1	22	1	1	0	59	60	0	0	0	miR-39	miR-409-3P	11	6	58.3	91.7	24	24	48	0	0
Pan(2012)		14	2	10	22	1	1	0	59	60	0	1	0	miR-39	miR-451+miR-409-3p	11	6	95.8	91.7	24	24	48	0	0
Liu JQ(2012)		120	18	18	50	1	1	0	62	61	0	1	0	miR-39	miR-16+miR-196a	17	8	87	73.5	138	68	206	1	1
Liu JQ(2012)		104	36	34	71	1	1	1	62	49	0	1	0	miR-39	miR-16+miR-196a	17	8	75.4	66.4	138	107	245	1	1
Liu JQ(2012)		89	37	49	138	1	1	1	62	53	0	1	0	miR-39	miR-16+miR-196a	17	8	64.5	78.9	138	175	313	1	1
Liu R(2012)		90	6	5	75	1	1	0	63	58	0	1	1	no	miR-20a,21,24,25,99a,185,191	18	8	94	93	95	81	176	1	1
Liu R(2012)		117	2	3	80	1	1	1	63	45	0	1	1	no	a set of 7 miRNAs	18	8	97.5	97.6	120	82	202	1	1
Ren(2012)		25	6	4	7	1	1	0	63	58	2	0	0	miR-16	miR-181b	15	7	84.6	51.7	29	13	42	1	0
Ren(2012)		20	9	9	4	1	1	0	63	58	2	0	0	miR-16	miR-196a	15	7	69.2	31	29	13	42	1	0
Ren(2012)		25	4	4	9	1	1	0	63	58	2	0	0	miR-16	miR-210	15	7	84.6	65.5	29	13	42	1	0
Schultz(2012)		158	8	2	20	0	0	0	63	64	1	1	0	no	a set of 9 miRNAs	15	6	98.5	70	160	28	188	0	1
Bauer(2012)		94	0	0	16	0	0	0	.	.	1	1	1	RNU6B	a set of 100 miRNAs	12	7	100	100	94	16	110	1	1
Bauer(2012)		85	3	9	16	0	0	1	.	.	1	1	1	RNU6B	a set of 100 miRNAs	12	7	90	84.4	94	19	113	1	1
Bauer(2012)		44	4	1	29	0	0	0	.	.	0	1	1	RNU6B	a set of 100 miRNAs	12	7	97.5	86.7	45	33	78	1	1
Bauer(2012)		35	18	10	20	0	0	1	.	.	0	1	1	RNU6B	a set of 100 miRNAs	12	7	78.7	53.3	45	38	83	1	1
Munding(2012)		39	2	3	31	0	0	1	.	.	1	0	0	miR24?	miR-135b	10	6	92.9	93.4	42	33	75	0	1
Panarelli (2012)		24	3	2	8	0	0	1	66	62	1	1	1	no	miR-21, -221, -155, -100,196a and -181b	15	9	92.3	72.7	26	11	37	1	0
Wang(2013)		107	10	22	50	1	1	1	63	44	0	0	0	RNU6B	miR-27a-3p	16	7	82.9	83.3	129	60	189	1	1
Wang(2013)		106	34	23	129	1	1	1	63	35	0	0	0	RNU6B	miR-27a-3p	16	7	82.2	79.1	129	163	292	1	1
Wang(2013)		106	24	23	79	1	1	1	63	44	0	0	0	RNU6B	miR-27a-3p	16	7	82.2	76.7	129	103	232	1	1
Zhang(2014)		41	18	29	22	1	0	0	.	.	0	0	0	RNU6B	miR-194	12	7	58	55	70	40	110	1	1
Zhang(2014)		53	18	17	22	1	0	0	.	.	0	0	0	RNU6B	miR-192	12	7	76	55	70	40	110	1	1
Zhang(2014)		59	10	11	30	1	0	0	.	.	0	1	0	RNU6B	miR-194+miR-192	12	7	84	75	70	40	110	1	1
Li(2013)		32	4	9	15	0	0	0	65	44	0	0	0	miR-16	miR-146a	12	7	78	79	41	19	60	1	1
Li(2013)		36	3	5	16	0	0	0	65	44	0	0	0	miR-16	miR1290	12	7	88	84	41	19	60	1	1
Li(2013)		30	7	11	28	0	0	1	65	.	0	0	0	miR-16	miR-146a	12	7	73	80	41	35	76	1	1
Li(2013)		34	11	7	24	0	0	1	65	.	0	0	0	miR-16	miR-1290	12	7	83	69	41	35	76	1	1
Li(2013)		32	16	9	38	0	0	1	65	.	0	0	0	miR-16	miR-146a	12	7	78	70	41	54	95	1	1
Li(2013)		33	7	8	11	0	0	1	65	.	0	0	0	miR-16	miR-1290	12	7	81	61	41	18	59	1	1
Zhao(2013)		53	18	17	22	1	0	0	60	60	0	0	0	RNU6B	miR-192	15	5	76	55	70	40	110	0	1
Ding(2013)		21	5	1	22	1	1	1	58	58	0	0	1	U47	miR-21	15	8	95.5	81.5	22	27	49	1	0
Ding(2013)		16	2	6	25	1	1	1	58	58	0	0	0	U47	miR-17-5p	15	8	72.7	92.6	22	27	49	1	0
Pan(2014)		22	7	8	19	1	1	0	58	48	0	0	0	U6	miR-25	13	6	73.3	73.1	30	26	58	0	1
Pan(2014)		21	4	9	22	1	1	0	58	48	0	0	0	U6	miR-210	13	6	70	84.6	30	26	58	0	1
Ganepola(2014)		9	3	3	8	0	1	0	68	46	0	0	0	miR-3196	miR-885-5p	15	6	82	73	11	11	22	0	0
Ganepola(2014)		9	2	3	9	0	1	0	68	46	0	0	0	miR-3196	miR-22-3p	15	6	82	82	11	11	22	0	0
Ganepola(2014)		9	5	3	6	0	1	0	68	46	0	0	0	miR-3196	miR-642b-3p	15	6	82	55	11	11	22	0	0
Ganepola(2014)		10	1	1	10	0	1	0	68	46	0	1	0	miR-3196	miR-885-5p+miR-22-3p+miR-642b-3p	15	6	91	91	11	11	22	0	0
Schultz(2014)		121	13	22	56	0	1	0	65	53	0	1	0	RNU44,RNU48	a set of 4 miRNAs	16	8	85	81	143	69	212	1	1
Schultz(2014)		153	71	27	128	0	1	0	65	50	0	1	0	RNU44,RNU48	a set of 4 miRNAs	16	8	85	64	180	199	379	1	1
Schultz(2014)		73	23	13	21	0	1	0	65	55	0	1	0	RNU44,RNU48	a set of 4 miRNAs	16	8	85	48	86	44	130	1	1
Schultz(2014)		121	9	22	70	0	1	0	65	53	0	1	0	RNU44,RNU48	a set of 10 miRNAs	16	8	85	89	143	69	212	1	1
Schultz(2014)		153	29	27	170	0	1	0	65	50	0	1	0	RNU44,RNU48	a set of 10 miRNAs	16	8	85	85	180	199	379	1	1
Schultz(2014)		73	20	13	24	0	1	0	65	55	0	1	0	RNU44,RNU48	a set of 10 miRNAs	16	8	85	55	86	44	130	1	1
Lin(2014)		42	5	7	22	1	1	0	62	61	0	0	0	miR-39	miR-633a	17	6	85.7	80	49	27	76	0	1
Lin(2014)		37	8	12	19	1	1	0	62	61	0	0	0	miR-39	miR-492	17	6	75.5	70	49	27	76	0	1
Yang(2014)		27	5	3	0	1	0	0	67	30	2	0	1	RNU6B	miR-21	13	8	90	83.3	30	15	45	1	0
Yang(2014)		23	4	7	11	1	0	0	67	30	2	0	0	RNU6B	miR-155	13	8	76.7	73.3	30	15	45	1	0
Yang(2014)		26	6	4	9	1	0	0	67	30	2	0	0	RNU6B	miR-216	13	8	86.7	60	30	15	45	1	0
Yang(2014)		28	5	2	10	1	0	0	67	30	2	1	0	RNU6B	miR-21+miR155	13	8	93.3	66.7	30	15	45	1	0
Yang(2014)		26	4	4	11	1	0	0	67	30	2	1	1	RNU6B	miR-21+miR216	13	8	86.7	73.3	30	15	45	1	0
Yang(2014)		27	5	3	10	1	0	0	67	30	2	1	0	RNU6B	miR-155+miR216	13	8	90	70	30	15	45	1	0
Shi(2014)		43	11	17	19	1	1	1	.	.	0	0	0	U6	miR-155	13	6	71.1	63.3	60	30	90	0	1
Shi(2014)		44	10	16	20	1	1	1	.	.	0	0	0	U6	miR-196a	13	6	73.4	65.8	60	30	90	0	1
Shi(2014)		46	9	14	21	1	1	1	.	.	0	1	0	U6	miR-155+miR196a	13	6	77.4	70.6	60	30	90	0	1
Madhavan(2014)		61	5	14	40	0	1	1	.	.	0	1	0	RNU6B，18S,RNU43,5S	miR-1246,miR-4644, miR-3976 and miR-4306,	17	7	81	94	75	45	120	1	1
Madhavan(2014)		61	5	14	48	0	1	1	.	.	0	1	0	RNU6B，18S,RNU43,6S	miR-1246,miR-4644, miR-3976 and miR-4306,	17	7	81	93	75	53	128	1	1
Yang(2014)		25	2	5	13	1	0	0	67	30	2	1	1	RNU6B	miR-21+155+216	12	6	83	84	30	15	45	0	0
Gregory(2014)		38	0	2	54	0	0	1	67	65	0	1	0	miR-425-5p	miR-10b,miR-155, miR-106b,miR-30c and miR-212	18	8	95	100	40	54	94	1	1
Gregory(2014)		29	0	0	75	0	0	1	67	65	0	1	0	miR-425-5p	miR-10b,miR-155, miR-106b,miR-30c and miR-212	18	8	100	100	40	54	94	1	1
Gregory(2014)		24	1	0	45	0	0	1	67	65	1	1	0	miR-425-5p	miR-10b,miR-155, miR-106b,miR-30c and miR-212	18	8	96	100	40	54	94	1	1
Gregory(2014)		28	0	0	61	0	0	1	67	65	1	1	0	miR-425-5p	miR-10b,miR-155, miR-106b,miR-30c and miR-212	18	8	100	100	40	54	94	1	1
Wang(2015)		36	6	7	15	1	1	0	58	54	0	0	0	miR-16	miR-483--3p	15	5	83.7	71.4	43	21	64	0	1
Wang(2015)		38	3	5	18	1	1	0	58	54	0	0	1	miR-16	miR-21	14	5	88.4	85.7	43	21	64	0	1
Wang(2015)		42	8	1	13	1	1	0	58	54	0	0	0	miR-16	miR-155	14	5	97.7	61.9	43	21	64	0	1
Abue(2015)		21	4	11	26	1	0	0	71	45	0	0	0	miR-16，RNU6B	miR-483-3p	17	8	65.6	86.7	32	30	62	1	1
Abue(2015)		24	8	8	22	1	0	0	71	45	0	0	1	miR-16，RNU6B	miR-21	17	8	80	73.3	32	30	62	1	1
Abue(2015)		29	7	3	5	1	0	1	71	75	0	0	1	miR-16，RNU6B	miR-21	17	8	90.6	41.7	32	12	44	1	0
Abue(2015)		26	8	6	4	1	0	1	71	75	0	0	0	miR-16，RNU6B	miR-483-3p	17	8	81.3	33.3	32	12	44	1	0
Abue(2015)		17	3	15	39	1	0	1	71	54	0	0	1	miR-16，RNU6B	miR-21	17	8	53.1	92.9	32	42	74	1	1
Abue(2015)		25	19	7	23	1	0	1	71	54	0	0	0	miR-16，RNU6B	miR-483-4p	17	8	78.1	54.8	32	42	74	1	1
Abue(2015)		31	2	1	40	1	0	1	71	54	0	1	1	miR-16，RNU7B	miR-483-3p+miR-21	17	8	96.9	95.2	32	42	74	1	1
Wang(2015)		83	14	27	56	1	0	1	58	50	0	0	0	miR-39	miR-155	16	8	75	80	110	70	180	1	1
Komatsu(2015)		44	4	27	63	1	1	0	.	.	0	0	0	RNU6B	miR-223	18	7	62	94.1	71	67	138	1	1
Wu(2015)		14	9	2	11	1	1	1	64	57	0	0	0	reference sequence	miR-210	10	6	87.5	53.3	16	20	36	0	0
Wu(2015)		13	9	3	11	1	1	1	64	57	0	0	1	reference sequence	miR-21	10	6	81.3	53.3	16	20	36	0	0
Wu(2015)		13	7	3	13	1	1	1	64	57	0	0	0	reference sequence	miR-29a	10	6	82.3	66.7	16	20	36	0	0
Hu(2015)		48	2	12	28	1	1	1	58	50	0	0	0	U6	miR-155	12	6	80	92	60	30	90	0	1
Hu(2015)		46	4	14	26	1	1	1	58	50	0	0	0	U6	miR-196a	12	6	76	88	60	30	90	0	1
Hu(2015)		40	5	20	25	1	1	1	58	50	0	0	1	U6	miR-21	12	6	66	84	60	30	90	0	1
Hu(2015)		29	1	31	29	1	1	1	58	50	0	0	0	U6	miR-210	12	6	48	96	60	30	90	0	1
Hu(2015)		57	2	3	28	1	1	1	58	50	0	1	0	U6	miR-155+196a+210	12	6	95	93.3	60	30	90	0	1
Hu(2015)		50	8	10	22	1	1	1	58	50	0	1	0	U6	miR-196a+210	12	6	83.3	73.3	60	30	90	0	1
Permuth-Wey(2015)		34	11	8	13	0	1	0	69	69	0	1	0	ACTB GAPDH	a set of 30 miRNAs	17	7	80.9	52.5	42	24	66	1	1
Note:	Ethnicity 0:Caucasian 1:Asian
	Patient spectrum 0:PDAC 1:PaC
	Source of control 0:HC 1:CP or CP+HC or DC
	miRNA 0:single miRNA 1: multiple miRNA
	miR-21 0:No 1:Yes
	QUDAS>6 0:QUDAS≤6 1:QUDAS>6
	n 0:n≤50 1:n＞50
